# Supplementary material
Source: publisher figshare collection journal article supplement (https://acs.figshare.com/ndownloader/files/4753102)
Supplement: Supplementary file 1 [file 4753102]

## **Supporting information**

### **Responses of Ammonium Sulfate Particles Coated With Glutaric Acid to Cyclic Changes in Relative Humidity: Hygroscopicity and Raman Characterization**

MAN NIN CHAN, ALEX K. Y. LEE, AND CHAK K. CHAN\*

Department of Chemical Engineering, Hong Kong University of Science and Technology, Clear Water Bay, Kowloon, Hong Kong

\*Corresponding author phone: (852) 2358-7124; fax: (852) 2358-0054; e-mail: keckchan@ust.hk

Page (including cover page): 4

Table: 1

Figure: 1

Table S1: The physical properties of ammonium sulfate and glutaric acid.

| Chemical                                                            | Molecular weight (g/mol) | Density (g/cm <sup>3</sup> ) | Solubility (g per 100 cm <sup>3</sup> H <sub>2</sub> O) | State (25°C) |
|---------------------------------------------------------------------|--------------------------|------------------------------|---------------------------------------------------------|--------------|
| Ammonium Sulfate<br>(NH <sub>4</sub> ) <sub>2</sub> SO <sub>4</sub> | 132.14                   | 1.769                        | 75.4                                                    | Solid        |
| Glutaric Acid<br>(COOH(CH <sub>2</sub> ) <sub>3</sub> COOH)         | 132.11                   | 1.424                        | 116                                                     | Solid        |

Figure S1: The hygroscopicity of ammonium sulfate particles in two deliquescence and crystallization cycles

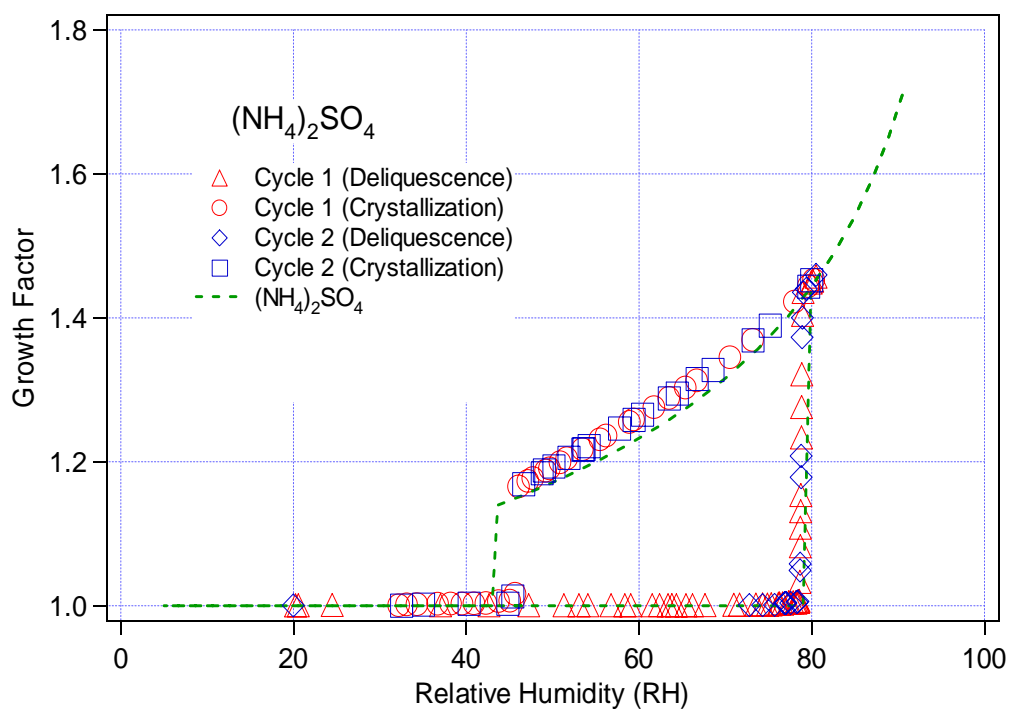

## Experimental Section

### Hygroscopic Measurement

#### Growth Factor Calculation

For comparison with the literature data reported in the form of a growth factor,  $G_f$ , our relative mass (mass fraction of solute,  $mfs$ ) measurements are converted to  $G_f$  as a function of RH. The  $G_f$  is defined as the diameter of the particle,  $d_p(RH)$ , at a given RH, to the diameter of the particle,  $d_p(RH_o)$ , at the reference RH<sub>o</sub> (RH<sub>o</sub> = 20%):

$$G_f(RH) = \frac{d_p(RH)}{d_p(RH_o)} = \left( \frac{mfs(RH_o) \cdot \rho(RH_o)}{mfs(RH) \cdot \rho(RH)} \right)^{1/3} \quad (1)$$

where  $\rho$  is the particle density. The estimated uncertainty in the  $mfs$  values were about 0.01 and 0.03 for droplets and solid particles, respectively. The densities and volume of solid particles and solution droplets were estimated utilizing the volume additivity rule (1-3). Using the similar approach, this rule for density estimates added about 5-10% uncertainty to the calculation of water absorption (3).

### Hygroscopic Growth

In estimating the hygroscopic growth of (NH<sub>4</sub>)<sub>2</sub>SO<sub>4</sub> particles coated with glutaric acid, we assumed that (NH<sub>4</sub>)<sub>2</sub>SO<sub>4</sub> and glutaric acid absorb water independently utilizing the Zdanovskii-Stokes-Robinson (ZSR) equation, which has been found to be useful in estimating the hygroscopic growth of the particles. The  $G_f$  of the particles can be estimated as:

$$G_f = (\epsilon_{organic} G_{f,organic}^3 + \epsilon_{inorganic} G_{f,inorganic}^3)^{1/3} \quad (2)$$

where  $\epsilon_{organic}$  and  $\epsilon_{inorganic}$  are the volume fractions of glutaric acid and (NH<sub>4</sub>)<sub>2</sub>SO<sub>4</sub> of the particles, respectively.  $G_{f,organic}$  and  $G_{f,inorganic}$  are the  $G_f$  of glutaric acid and (NH<sub>4</sub>)<sub>2</sub>SO<sub>4</sub> particles at given RH, respectively. The  $G_f$  of (NH<sub>4</sub>)<sub>2</sub>SO<sub>4</sub> particles is obtained from Chan et al. (4). The hygroscopicity of glutaric acid particles has been measured by Peng et al. (5) utilizing an EDB and by Prenni et al. (6) utilizing a HTDMA. Prenni et al. (6) reported a  $G_f$  of 1.29, which is close to a  $G_f$  of 1.30 as reported by Peng et al. (5). The  $G_f$  of glutaric acid particles is obtained from Peng et al. (5) because both deliquescence and crystallization data were available and the particle size was similar to those investigated in our study. The estimated  $G_f$  of the particles from Eq. 2 is depicted in Figures 1a and 2a (orange dotted line). The estimated  $G_f$  are the same for two deliquescence and crystallization cycles because the same aerosol composition was used in the ZSR calculations since the evaporation loss of glutaric acid was not significant.

As shown in the Figures 1a and 2a, the ZSR predictions can generally capture the hygroscopic growth of mixed (NH<sub>4</sub>)<sub>2</sub>SO<sub>4</sub>-glutaric acid solution droplets. These results are consistent with the previous studies that the ZSR method can provide a good estimation on the hygroscopic growth of mixed (NH<sub>4</sub>)<sub>2</sub>SO<sub>4</sub>-glutaric acid solution droplets after deliquescence at a single high RH (e.g., 85%RH) (2, 3).

We have also compared our results with other experimental results. The  $G_f$  of the particle was 1.42-1.43 at 80%RH in the two cycles, which compares favorably with the  $G_f$  of  $1.39 \pm 0.04$  at 80%RH for mixed  $(\text{NH}_4)_2\text{SO}_4$ -glutaric acid particles ( $\sim 9\text{wt}\%$  glutaric acid) reported by Prenni et al. (7).  $(\text{NH}_4)_2\text{SO}_4$  particles coated with 49wt% glutaric acid (Figure 2a) had a  $G_f$  of 1.34-1.36 at 80%RH, which was comparable with the  $G_f$  of  $1.30 \pm 0.04$  for mixed  $(\text{NH}_4)_2\text{SO}_4$ -glutaric acid particles ( $\sim 50\text{wt}\%$  glutaric acid) as reported by Prenni et al. (7).

### Literature cited

1. Tang, I. N.; Munkelwitz, H. R. Water activities, densities, and refractive-indexes of aqueous sulfates and sodium-nitrate droplets of atmospheric importance. *J. Geophys. Res.* **1994**, 99, 18801-18808.
2. Choi, M. Y.; Chan, C. K. Effect of organic species on the hygroscopic behaviors of inorganic aerosols. *Environ. Sci. Technol.* **2002**, 36, 2422-2428.
3. Cruz, C. N.; Pandis, S. N. Deliquescence and hygroscopic growth of mixed inorganic-organic atmospheric aerosol. *Environ. Sci. Technol.* **2000**, 34, 4313-4319.
4. Chan, C. K.; Flagan, R. C.; Seinfeld, J. H. Water activities of  $\text{NH}_4\text{NO}_3/(\text{NH}_4)_2\text{SO}_4$  solutions. *Atmos. Environ.* **1992**, 26, 1661-1673.
5. Peng, C.; Chan, M. N.; Chan, C. K. The hygroscopic properties of dicarboxylic and multifunctional acids: Measurements and UNIFAC predictions. *Environ. Sci. Technol.* **2001**, 35, 4495-4501.
6. Prenni, A. J.; DeMott, P. J.; Kreidenweis, S. M.; Sherman, D. E.; Russell, L. M.; Ming, Y. The effect of low molecular weight dicarboxylic acids on cloud formation. *J. Phys. Chem. A* **2001**, 105, 11240-11248.
7. Prenni, A.J.; DeMott, P.J.; Kreidenweis, S.M. Water uptake of internally mixed particles containing ammonium sulfate and dicarboxylic acids. *Atmos. Environ.* **2003**, 37, 4243-4251.
